# Supplementary material for: A pH tuning single fluorescent probe based on naphthalene for dual-analytes (Mg2+ and Al3+) and its application in cell imaging
Source: Royal Society of Chemistry journal article supplement (doi:10.1039/d0ra02101f), 2020-01-01
Supplement: d0ra02101f1.pdf [file d0ra02101f1.pdf]

## ***Supporting Information***

### **A pH tuning single fluorescent probe based on naphthalene for multi-analytes (Mg<sup>2+</sup> and Al<sup>3+</sup>) and its application in cell imaging**

Yu Chunwei<sup>a</sup>, Cui Shuhua<sup>b</sup>, Ji Yuxiang<sup>a</sup>, Wen Shaobai<sup>a</sup>, Jian Li<sup>a</sup>, Zhang Jun<sup>a,c\*</sup>

<sup>a</sup>Laboratory of Environmental Monitoring, School of Tropical and Laboratory Medicine, Hainan Medical University, Haikou, Hainan 571101, P. R. China;

<sup>b</sup>Weifang University of Science and Technology, Shouguang, Shandong 262700, P. R. China;

<sup>c</sup>Key Laboratory of Tropical Translational Medicine of Ministry of Education and School of Tropical Medicine and Laboratory Medicine, Hainan medical University, Haikou, Hainan 571199, P. R. China.

\*Corresponding author E-mail address: jun\_zh1979@163.com (J. Zhang)

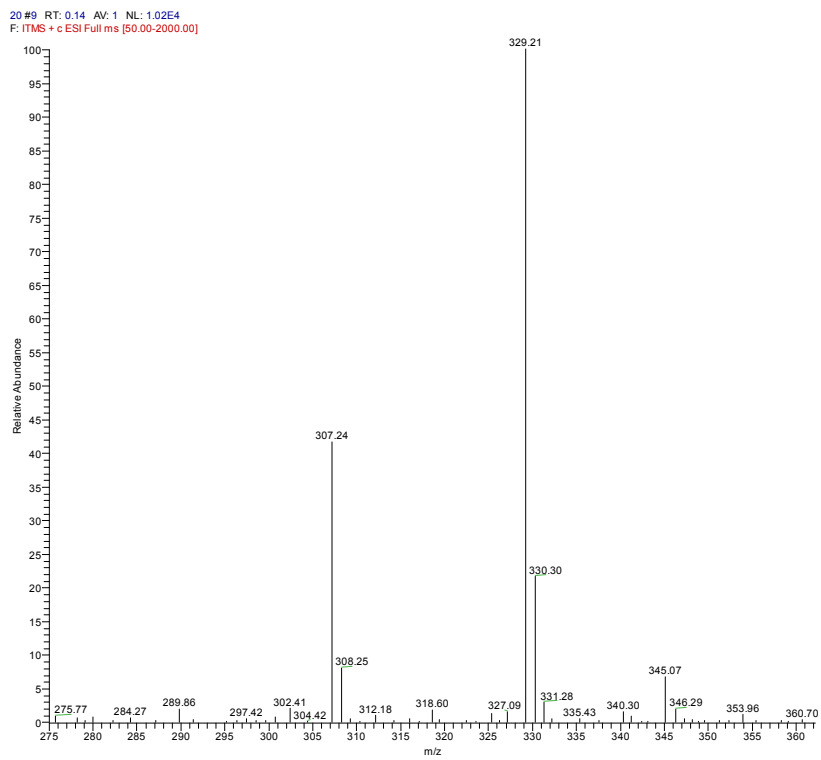

**Fig. S1** ESI-MS mass spectra of compound **P**.

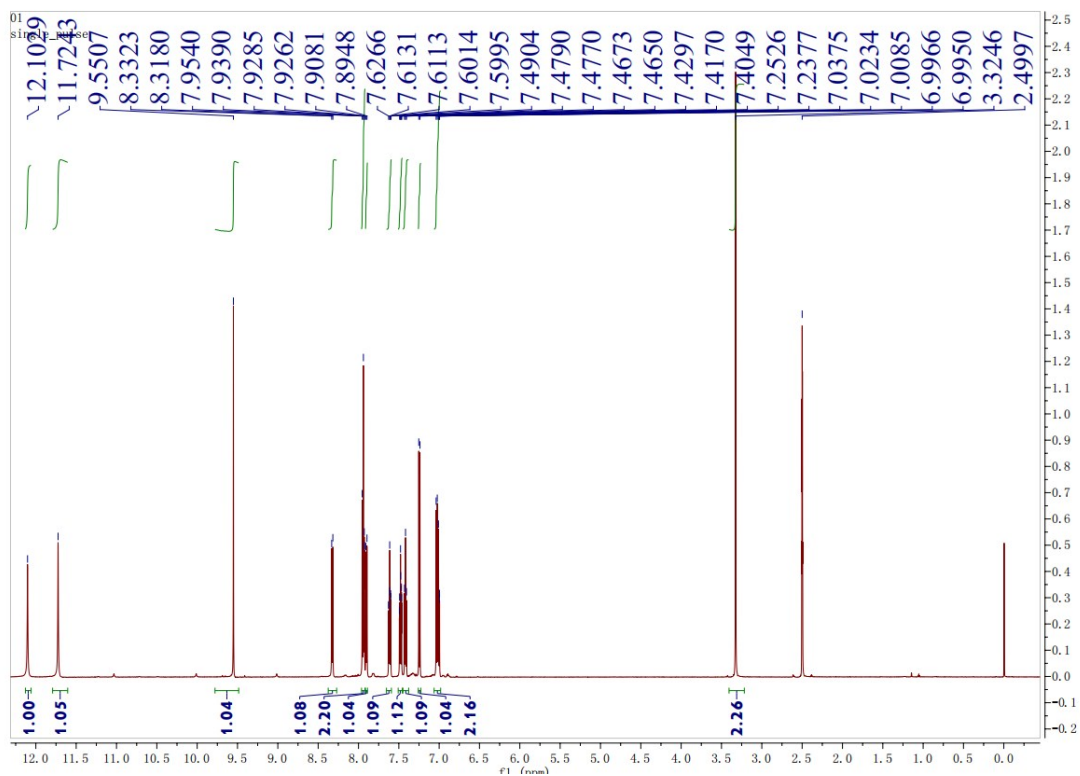

Fig. S2  $^1\text{H}$  NMR spectrum of compound P.

29 in DMSO (c13)

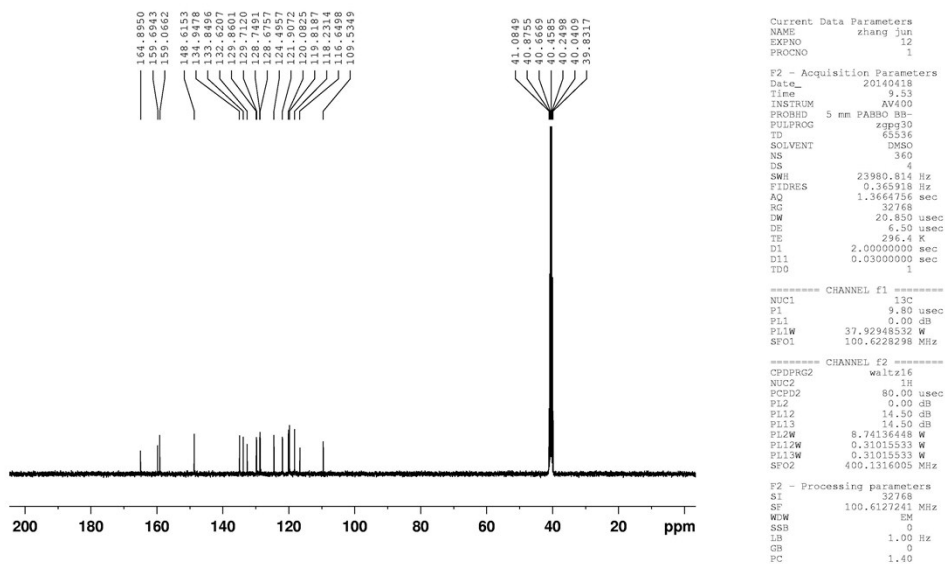

Fig. S3  $^{13}\text{C}$  NMR spectrum of compound P.

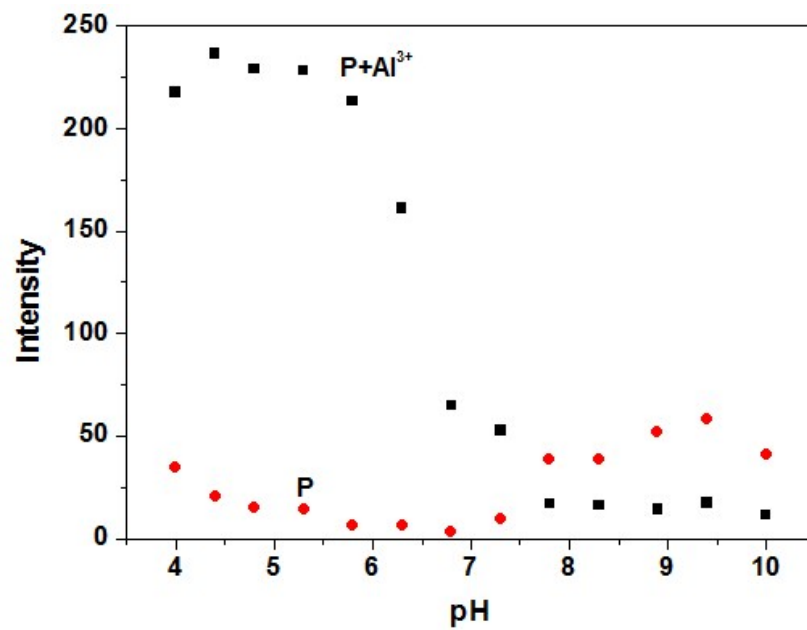

**Fig. S4** Influences of pH on the fluorescence spectra of **P** (10  $\mu\text{M}$ ) and **P** (10  $\mu\text{M}$ ) plus  $\text{Al}^{3+}$  (10  $\mu\text{M}$ ) in the ethanol–water solution (1:9, v:v). The pH was modulated by adding 1.0 M HCl or 1.0 M NaOH in HEPES buffers.

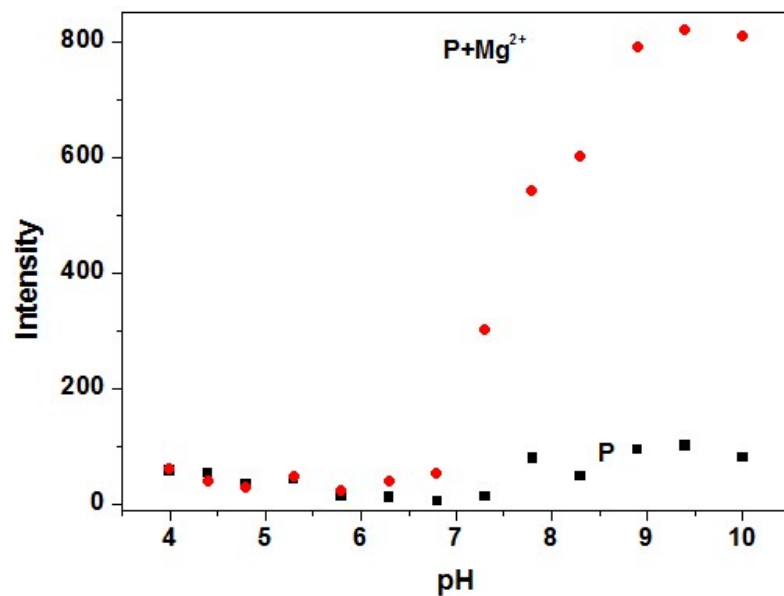

**Fig. S5** Influences of pH on the fluorescence spectra of **P** (10  $\mu$ M) and **P** (10  $\mu$ M) plus  $\text{Mg}^{2+}$  (10  $\mu$ M) in the ethanol–water solution (1:9, v:v). The pH was modulated by adding 1.0 M HCl or 1.0 M NaOH in HEPES buffers.

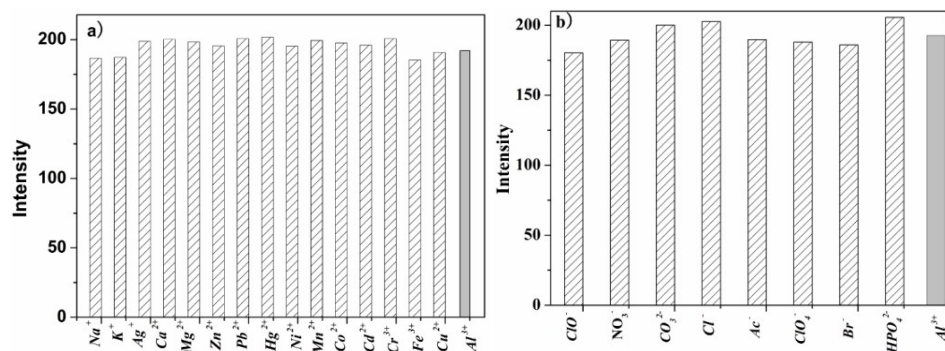

**Fig. S6** a) Fluorescence response of **P** (10  $\mu$ M) to 10  $\mu$ M of  $\text{Al}^{3+}$  and to the mixture of 10  $\mu$ M individual other metal ions with 10  $\mu$ M of  $\text{Al}^{3+}$  in ethanol-water solution (1:9, v:v, 20 mM HEPES, pH 6.3); b) Fluorescence response of **P** (10  $\mu$ M) to 10  $\mu$ M of  $\text{Al}^{3+}$  and to the mixture of 10  $\mu$ M individual anions with 10  $\mu$ M of  $\text{Al}^{3+}$  in ethanol-water solution (1:9, v:v, 20 mM HEPES, pH 6.3).

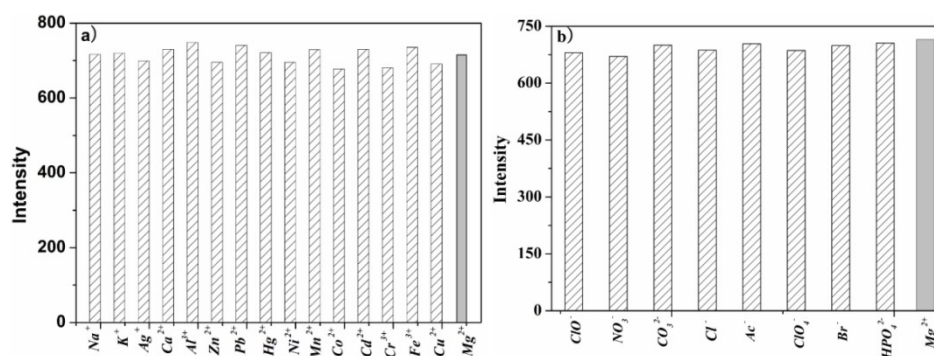

**Fig. S7** a) Fluorescence response of **P** (10  $\mu\text{M}$ ) to 10  $\mu\text{M}$  of  $\text{Mg}^{2+}$  and to the mixture of 10  $\mu\text{M}$  individual other metal ions with 10  $\mu\text{M}$  of  $\text{Mg}^{2+}$  in ethanol-water solution (1:9, v:v, pH 9.4, 20 mM HEPES); b) Fluorescence response of **P** (10  $\mu\text{M}$ ) to 10  $\mu\text{M}$  of  $\text{Mg}^{2+}$  and to the mixture of 10  $\mu\text{M}$  individual anions with 10  $\mu\text{M}$  of  $\text{Mg}^{2+}$  in ethanol-water solution (1:9, v:v, pH 9.4, 20 mM HEPES).



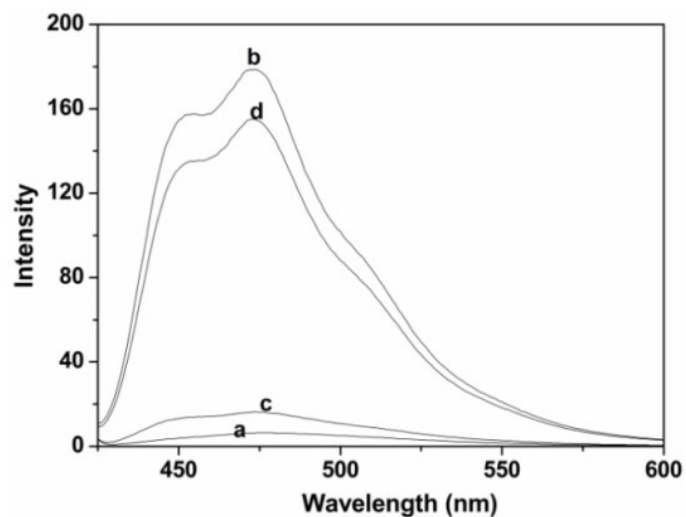

**Fig. S8** Fluorescence response in ethanol-water solution (1:9, v:v, pH 6.3, 20 mM HEPES): a) **P** (10  $\mu$ M); b) **P** (10  $\mu$ M ) with  $\text{Al}^{3+}$  (10  $\mu$ M); (c) **P** (10  $\mu$ M ) with  $\text{Al}^{3+}$  (10  $\mu$ M) and then addition of EDTA (50  $\mu$ M); (d) **P** (10  $\mu$ M ) with  $\text{Al}^{3+}$  (10  $\mu$ M) and then addition of EDTA (50  $\mu$ M) and then addition of 0.1 mM  $\text{Al}^{3+}$ .

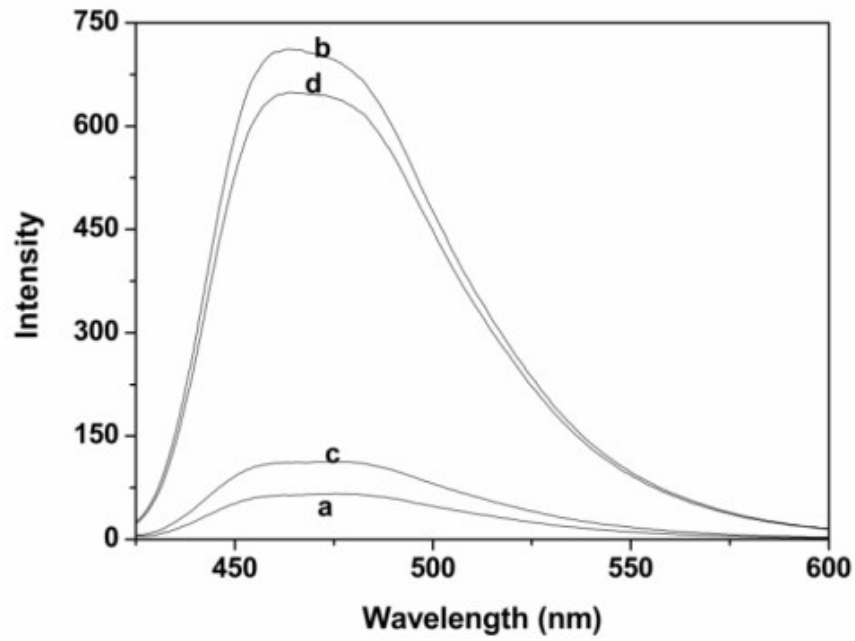

**Fig. S9** Fluorescence response in ethanol-water solution (1:9, v:v, pH 9.4, 20 mM HEPES): a) **P** (10  $\mu$ M); b) **P** (10  $\mu$ M ) with  $Mg^{2+}$  (10  $\mu$ M); (c) **P** (10  $\mu$ M ) with  $Mg^{2+}$  (10  $\mu$ M) and then addition of EDTA (50  $\mu$ M); (d) **P** (10  $\mu$ M ) with  $Mg^{2+}$  (10  $\mu$ M) and then addition of EDTA (50  $\mu$ M) and then addition of 0.1 mM  $Mg^{2+}$ .

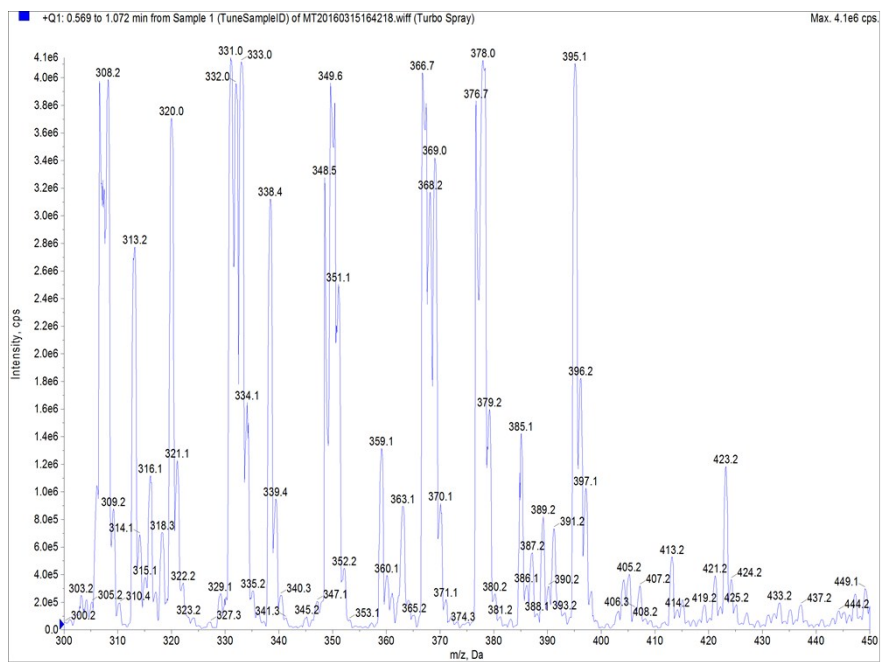

**Fig. S10** Partial ESI-MS of **P** in the presence of 1.0 equiv. of  $\text{Al}^{3+}$  in ethanol.

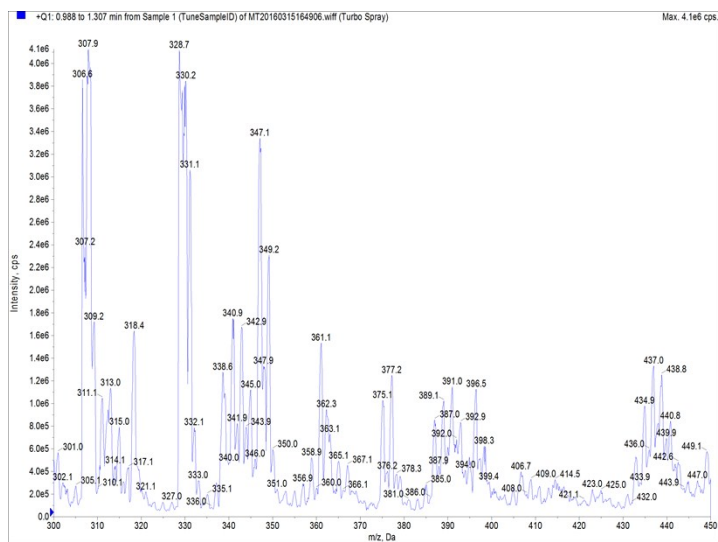

**Fig. S11** Partial ESI-MS of **P** in the presence of 1.0 equiv. of Mg<sup>2+</sup> in ethanol.

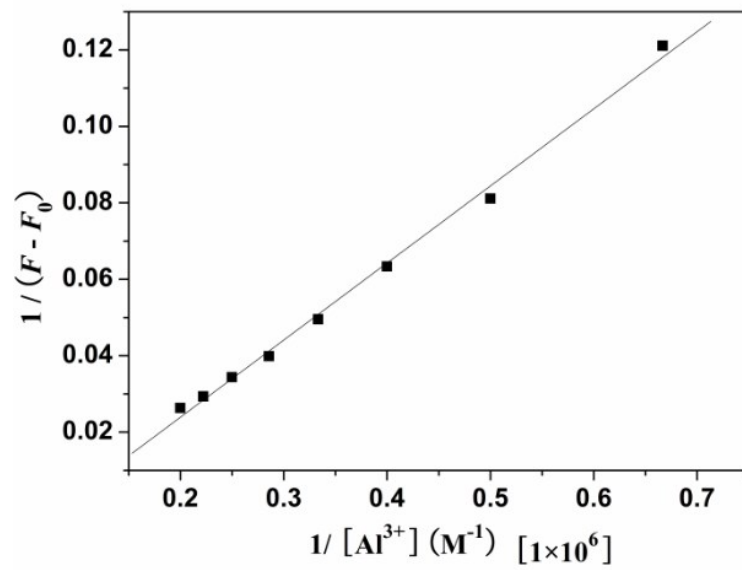

Fig. S12 Benesi-Hildebrand plot of **P**, assuming 1:1 stoichiometry for **P**- $Al^{3+}$ .

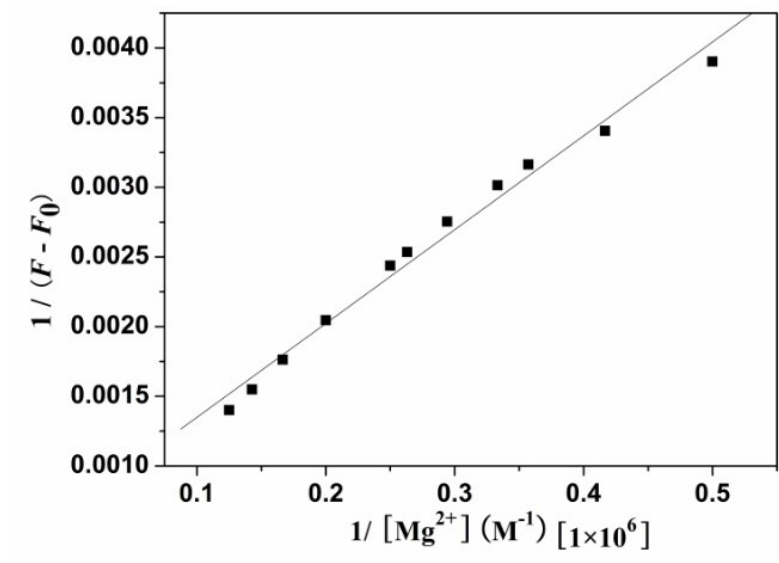

Fig. S13 Benesi-Hildebrand plot of **P**, assuming 1:1 stoichiometry for **P**- $Mg^{2+}$ .

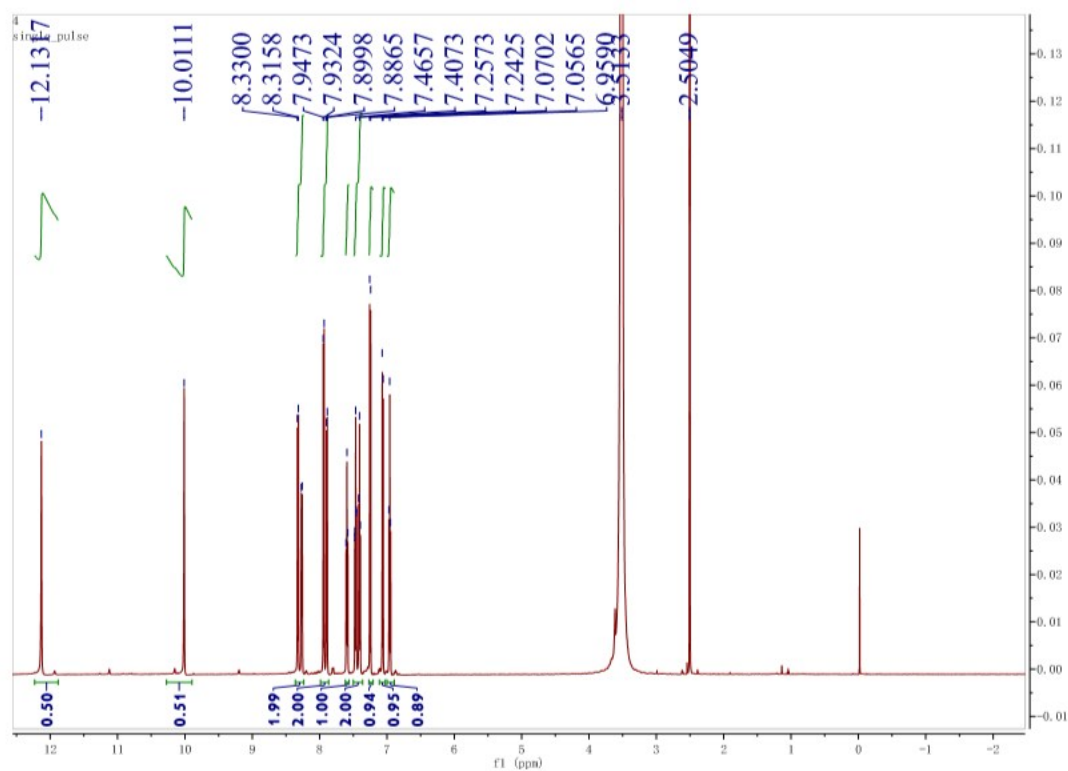

**Fig. S14** <sup>1</sup>H NMR of P-Mg<sup>2+</sup>. (Nuclear magnetic resonance (NMR) spectra were measured with a Bruker AV 600 instrument and chemical shift were given in ppm from tetramethylsilane (TMS)).

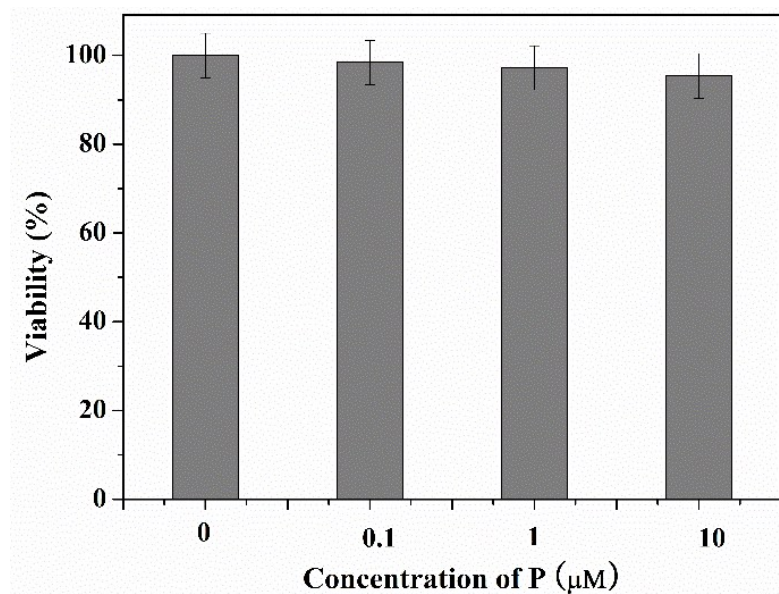

**Fig. S15** Cell viability values (%) estimated by MTT proliferation test versus incubation concentrations of **P**. HepG2 cells were cultured in the presence of 0–10  $\mu\text{M}$  **P** at 37 °C.
